# Supplementary material for: Formulation of concentrated and stable ink of silver nanowires with applications in transparent conductive films
Source: Royal Society of Chemistry journal article supplement (doi:10.1039/c6ra25508f), 2017-01-01
Supplement: c6ra25508f1.pdf [file c6ra25508f1.pdf]

## Electronic Supplementary Information

### Formulation of concentrated and stable ink of silver nanowires with applications in transparent conductive films

Chao Chen,<sup>ab</sup> Yonggao Jia,<sup>ab</sup> Dan Jia,<sup>ab</sup> Shuxin Li,<sup>a</sup> Shulin Ji<sup>\*a</sup> and Changhui Ye<sup>\*a</sup>

<sup>a</sup>Key Laboratory of Materials Physics and Anhui Key Laboratory of Nanomaterials and Technology, Institute of Solid State Physics, Chinese Academy of Sciences, Hefei 230031, China.

<sup>b</sup>University of Science and Technology of China, Hefei 230026, China.

\*Corresponding authors. E-mails: slji@issp.ac.cn, chye@issp.ac.cn

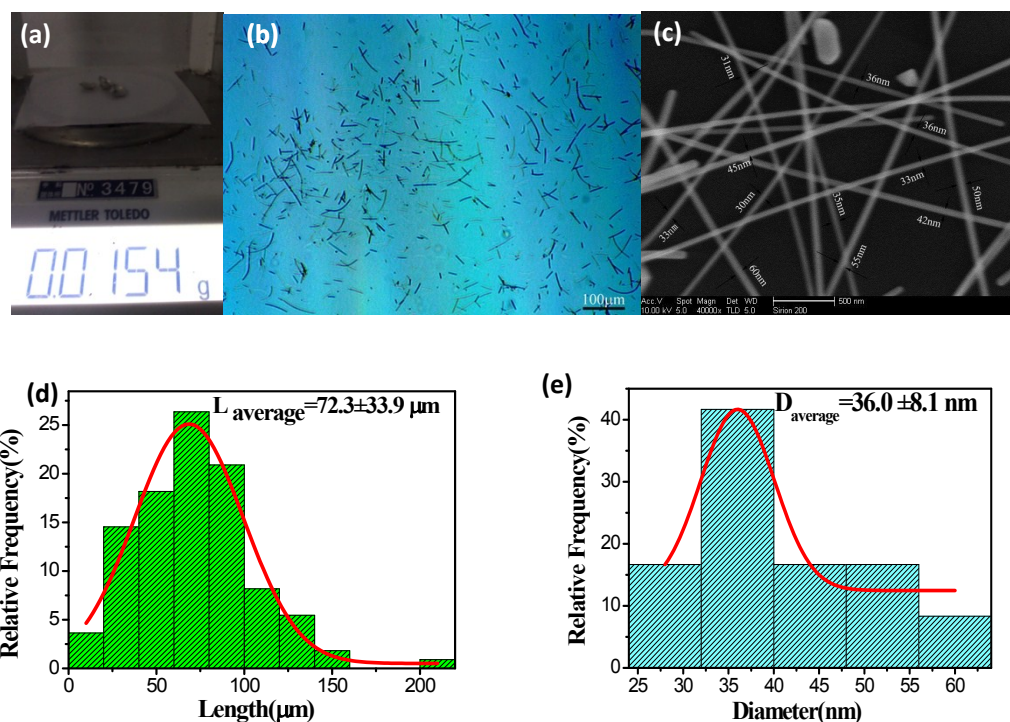

**Fig. S1** (a) Yield, (b) optical image, (c) FE-SEM image, (d) length, and (e) diameter distributions of AgNWs.

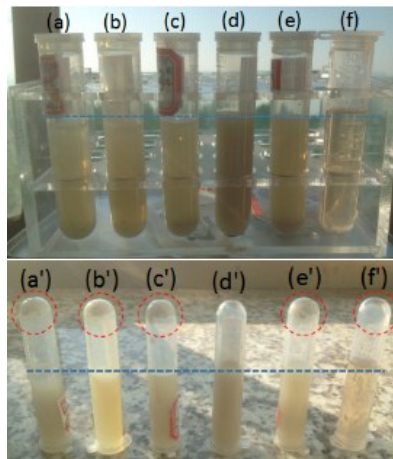

**Fig. S2** Photograph of AgNW inks left still at room temperature for the same period (14 days) where  $V_{\text{NMP}}/V_{\text{EG}}$  was (a, a') 1:8, (b, b') 2:7, (c, c') 3:6, (d, d') 4:5, (e, e') 5:4 and (f, f') 7:2, while  $C_{\text{PVP}}$ ,  $C_{\text{AgNW}}$ , and  $C_{\text{glycerol}}$  were kept as 7.5 mg/mL, 0.3 mg/mL, and 10 vol%, respectively.

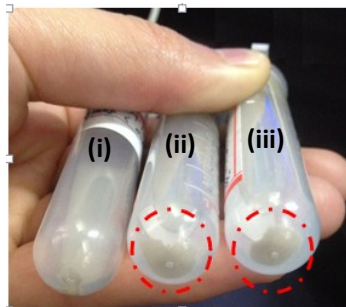

**Fig. S3** Photograph of AgNW inks left still at room temperature for the same period (14 days) where  $C_{\text{AgNW}}$  was (i) 0.6, (ii) 1.2, and (iii) 2.4 mg/mL, while  $V_{\text{NMP}}/V_{\text{EG}}/V_{\text{glycerol}}$  and  $C_{\text{PVP}}$  were kept as 4:5:1 and 7.5 mg/mL, respectively.

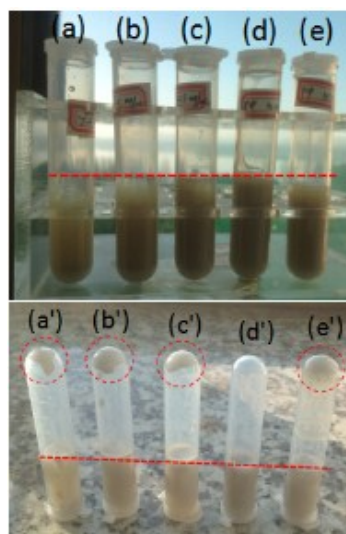

**Fig. S4** Photograph of AgNW inks left still at room temperature for the same period (14 days) where  $C_{\text{PVP}}$  was (a, a') 7.5, (b, b') 15, (c, c') 22.5, (d, d') 30, (e, e') 37.5 mg/mL, while  $C_{\text{AgNW}}$ , and  $V_{\text{NMP}}/V_{\text{EG}}/V_{\text{glycerol}}$  were kept as 1.2 mg/mL and 4:5:1, respectively.

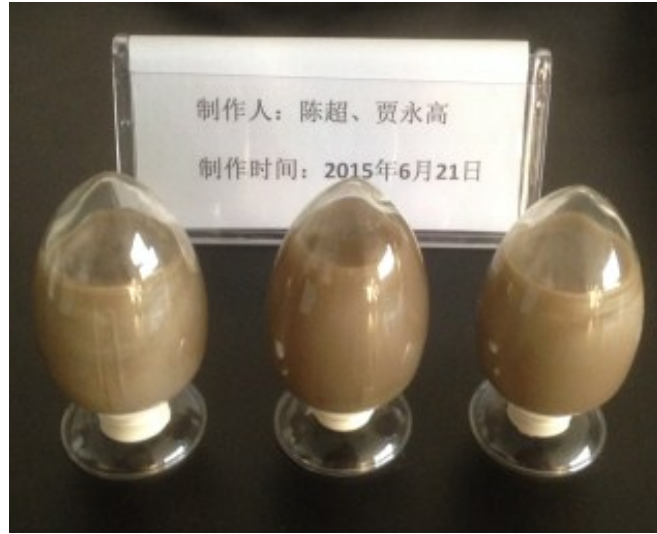

**Fig. S5** Photograph of AgNW inks left still at room temperature for 6 months where  $C_{\text{AgNW}}$ ,  $C_{\text{PVP}}$  and  $V_{\text{NMP}}/V_{\text{EG}}/V_{\text{glycerol}}$  were kept as 5 mg/mL, 30 mg/mL and 4:5:1.

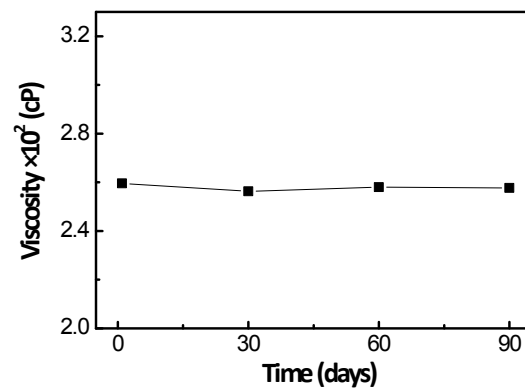

**Fig. S6** Viscosity change of 5 mg/mL AgNW ink with time.

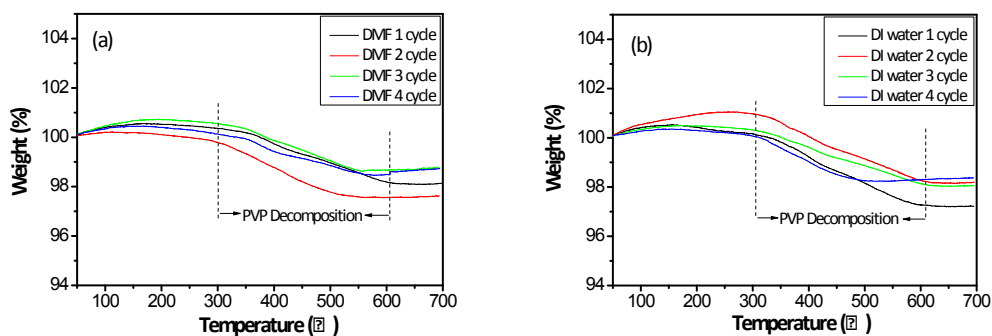

**Fig. S7** TGA curves of AgNWs cleaned for different cycles by (a) DMF and (b) DI water.

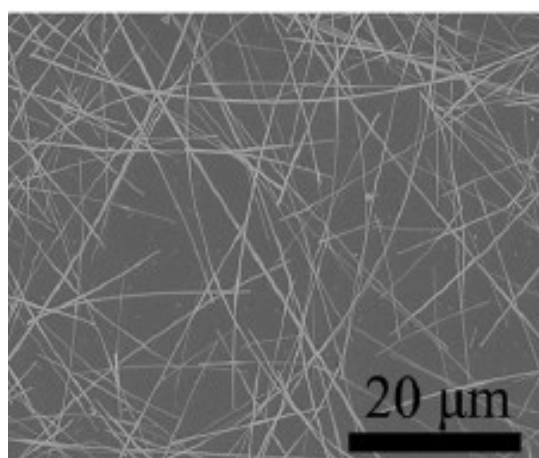

**Fig. S8** SEM image of the film composed of AgNWs cleaned by DMF for 2 cycles and re-dispersed in ethanol.

**Table S1** Comparison of residual PVP content from TGA curves under different purification cycles with DMF and DI water.

| Purification method   | Initial weight<br>(mg) | Weight loss of PVP<br>(mg) | Relative weight of PVP |
|-----------------------|------------------------|----------------------------|------------------------|
| 1 cycle with DI water | 0.7951                 | 0.0220                     | 0.0277                 |
| 1 cycle with DMF      | 0.9843                 | 0.0268                     | 0.0272                 |
| 2 cycle with DI water | 0.8482                 | 0.0230                     | 0.0271                 |
| 2 cycle with DMF      | 1.0162                 | 0.0183                     | 0.0180                 |
| 3 cycle with DI water | 1.2048                 | 0.0260                     | 0.0216                 |
| 3 cycle with DMF      | 1.2068                 | 0.0200                     | 0.0166                 |
| 4 cycle with DI water | 1.1242                 | 0.0220                     | 0.0196                 |
| 4 cycle with DMF      | 0.8747                 | 0.0130                     | 0.0149                 |
